# Supplementary material for: CD95 promotes metastatic spread via Sck in pancreatic ductal adenocarcinoma
Source: PubMed Central journal article supplement (PMC4572867; doi:10.1038/cdd.2014.217), 2015-01-23

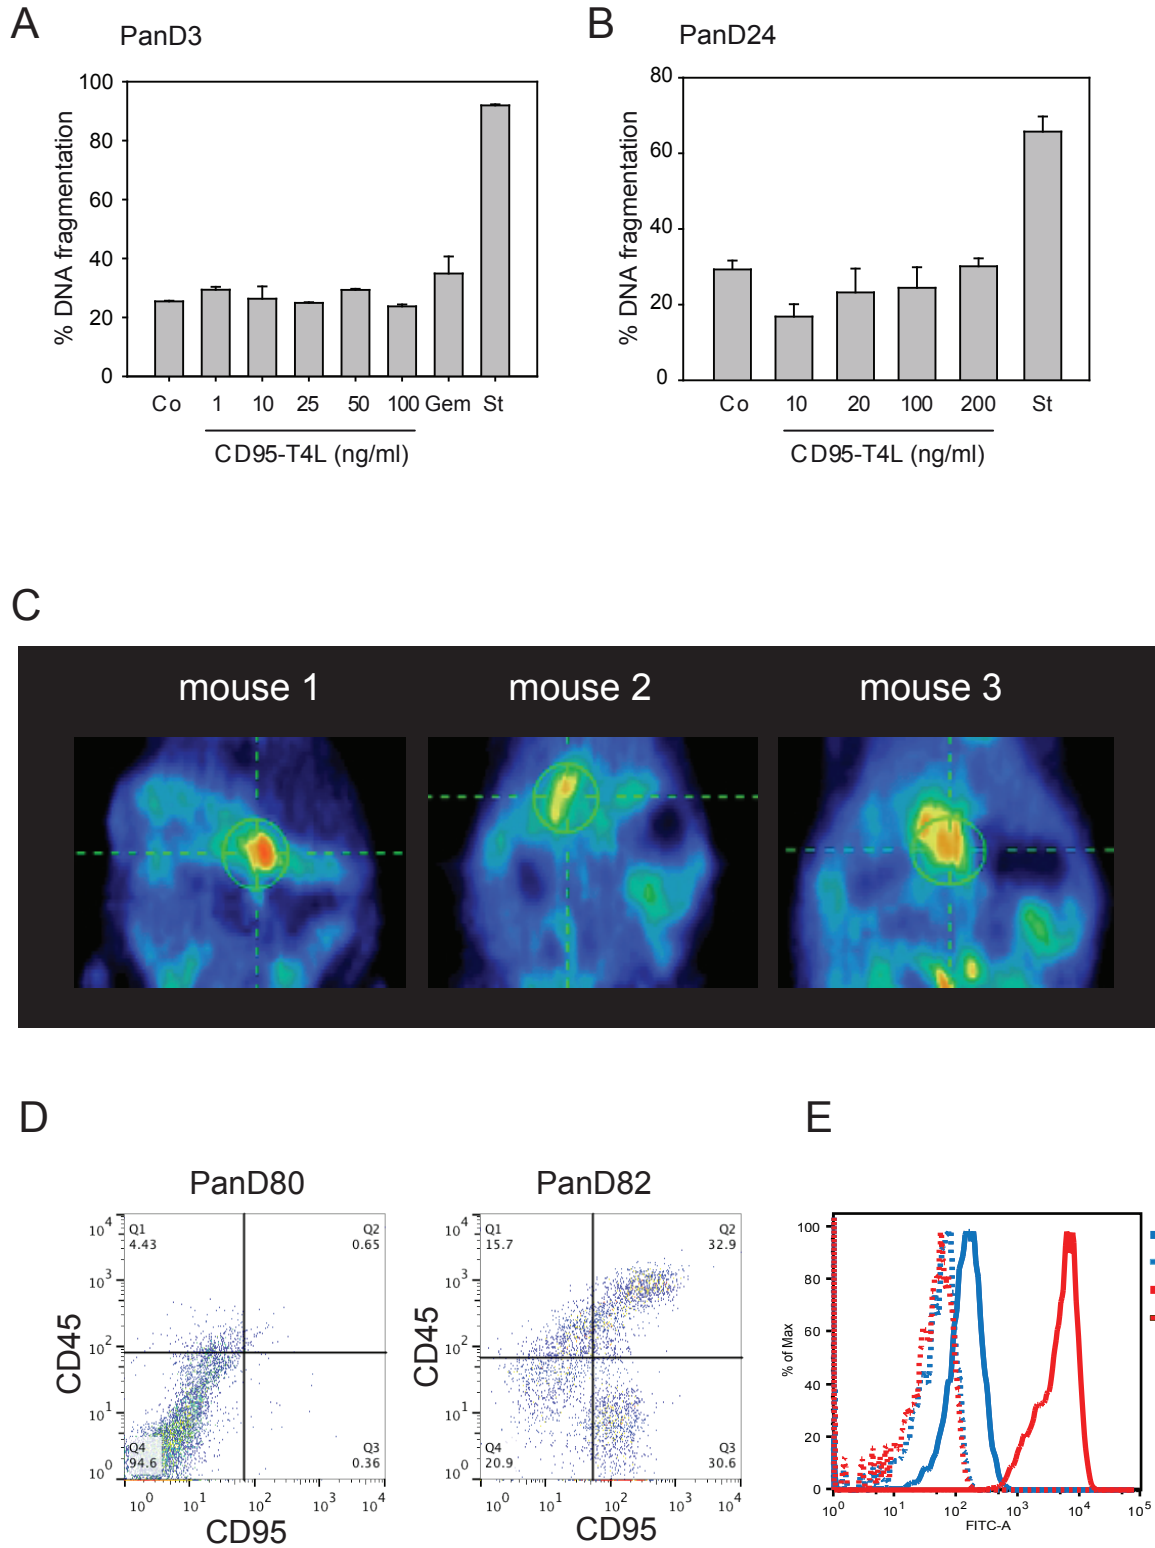

Supplement: cdd2014217x2.pdf [file cdd2014217x2.pdf]
